# Supplementary material for: Amino-decorated lanthanide(iii) organic extended frameworks for multi-color luminescence and fluorescence sensing
Source: Royal Society of Chemistry journal article supplement (doi:10.1039/c4tc00962b), 2014-01-01
Supplement: c4tc00962b1.pdf [file c4tc00962b1.pdf]

## Supporting Information

### Amino-decorated lanthanide (III) – organic extended frameworks for multi-color luminescence and fluorescence sensing

Ji-Na Hao, Bing Yan\*

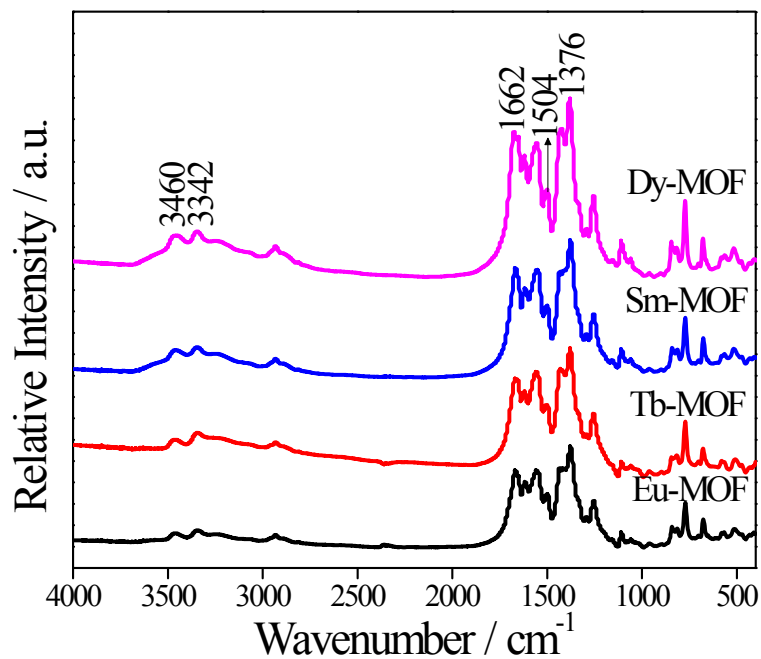

Figure S1 IR spectra of Ln-MOF.

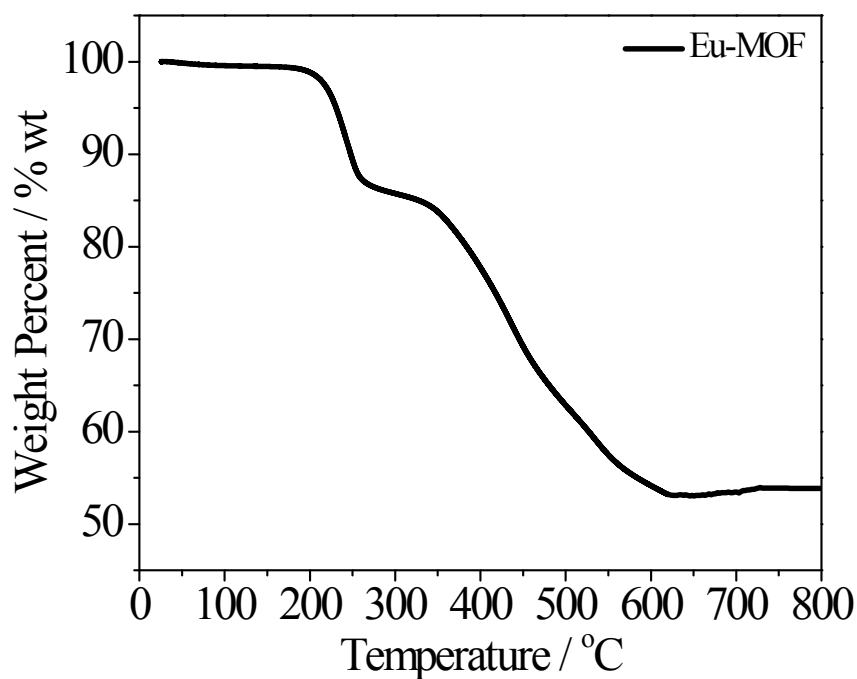

Figure S2 Thermal gravimetric analysis of Eu-MOF.

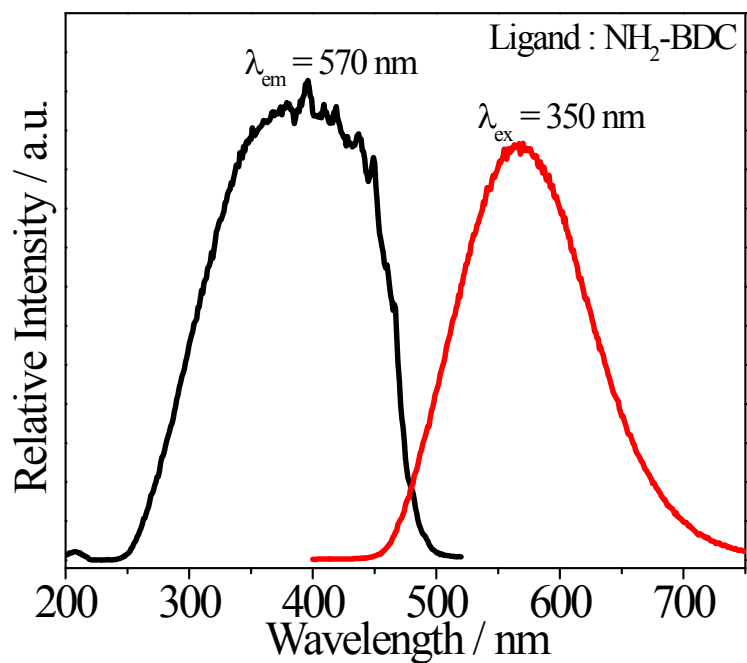

**Figure S3** Excitation and emission spectra of pure ligand NH<sub>2</sub>-BDC

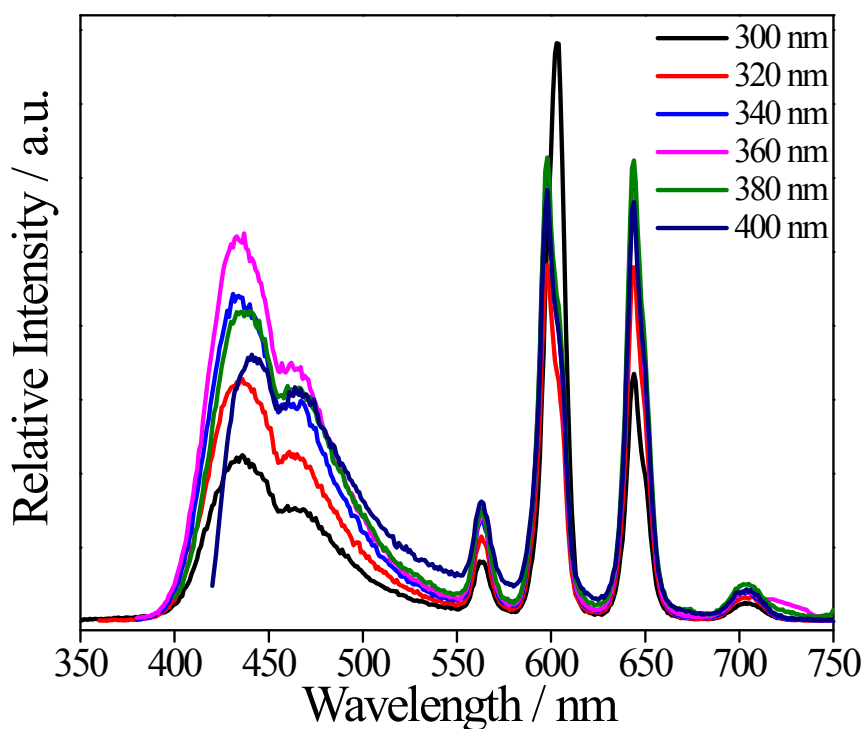

**Figure S4** The emission spectra of Sm-MOF monitored at different excitation wavelength. With excitation wavelength varying from 300 to 400 nm, the relative emission intensity of the ligand and Sm-luminescence is different, thus leading to the different values of CIE(x,y).

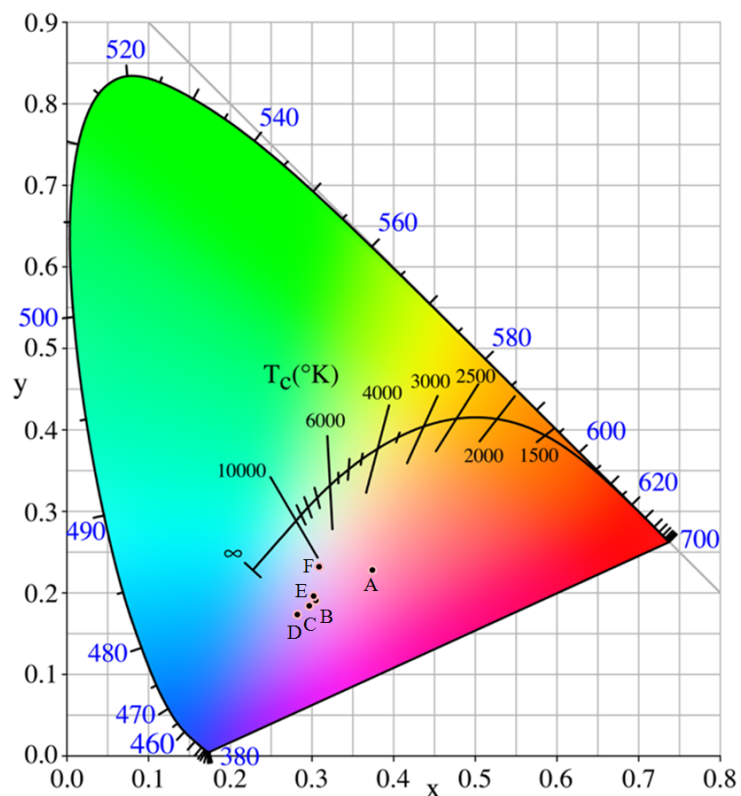

**Figure S5** Emission spectra of Sm-MOF plotted on a CIE diagram with excitation wavelengths varying from 300 (A) to 400 nm (B ~ F, step size 20 nm) showing tunable chromaticity of visual emission image.

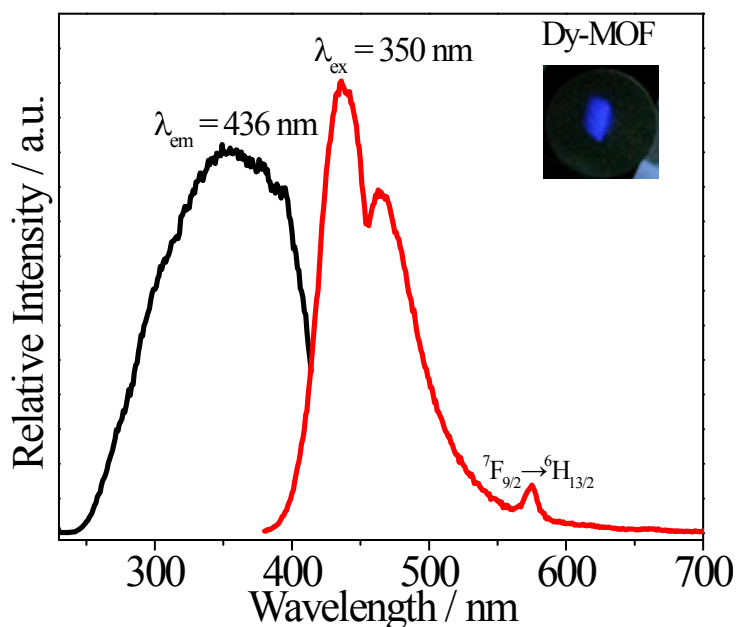

**Figure S6** Excitation and emission spectra of Dy-MOF, and its blue luminescence color with the UV excitation using a Xe lamp as the excitation source.

**Table S1** The luminescence data of Ln-MOF

| materials | $\lambda_{\text{ex}} / \lambda_{\text{em}}$ (nm) | $\tau$ ( $\mu\text{s}$ ) | $\eta$ (%) | CIE(x,y)         |
|-----------|--------------------------------------------------|--------------------------|------------|------------------|
| Eu-MOF    | 333/614                                          | 717                      | 3.8        | (0.64, 0.3382)   |
| Tb-MOF    | 380/545                                          | 20                       | 1.0        | (0.316, 0.5007)  |
| Sm-MOF    | 300/644                                          | 14                       | 0.6        | (0.3748, 0.2285) |
| Dy-MOF    | 350/575                                          | 13                       | 0.8        | (0.1607, 0.1133) |

$\tau$ , lifetime;  $\eta$ , the emission quantum efficiency.

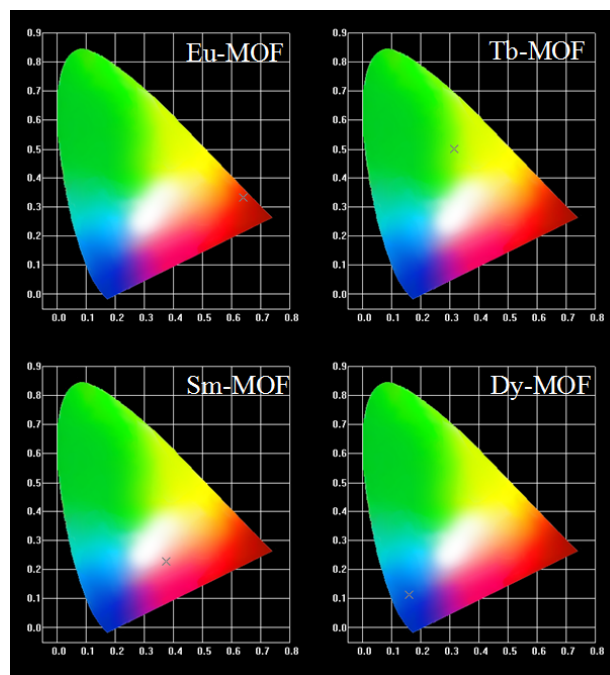**Figure S7** CIE chromaticity diagram of Ln-MOF. The values of CIE(x, y) were listed at **Table S1**.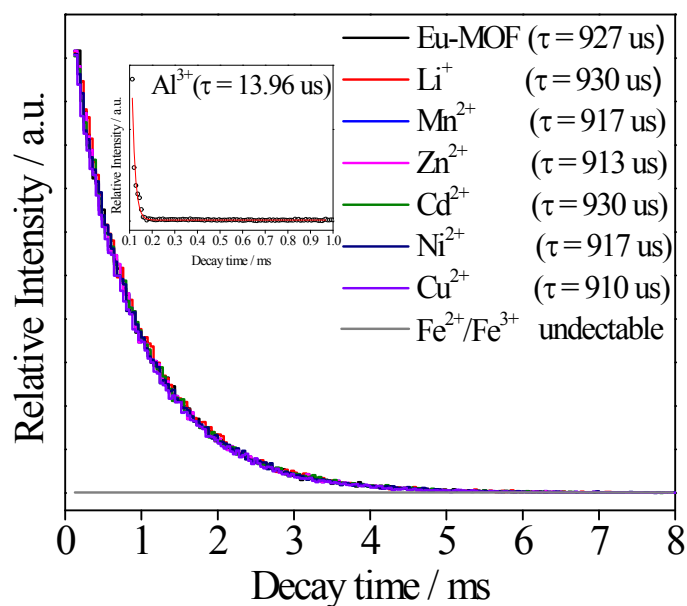**Figure S8** Response of lifetime of Eu-MOF towards DMF solution of various metal cations, the inset shows the lifetime of Eu-MOF in the presence of  $\text{Al}^{3+}$ .

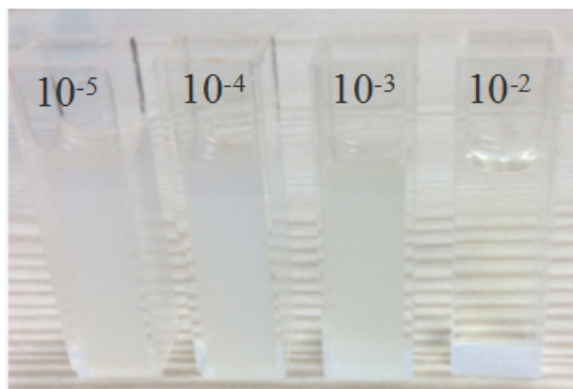

**Figure S9** The pictures of Eu-MOF in DMF in the presence of different concentrations of  $\text{Al}^{3+}$ . With the  $\text{Al}^{3+}$  concentrations increasing, the solutions changed from turbid to clear solution.

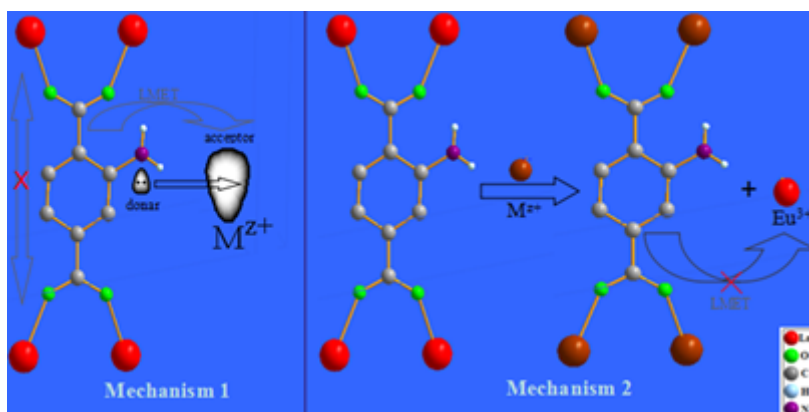

**Scheme S1** Schematic illustration of the luminescence quenching mechanism of Eu-MOF by metal ions (Mechanism 1 for  $\text{M}^{z+} = \text{Li}^+, \text{Mn}^{2+}, \text{Zn}^{2+}, \text{Cd}^{2+}, \text{Ni}^{2+}$  and  $\text{Cu}^{2+}$  ions; Mechanism 2 for  $\text{Al}^{3+}$  and  $\text{Fe}^{2+}/\text{Fe}^{3+}$ ).
